# Supplementary material
Source: Springer Nature journal article supplement (https://www.springermedizin.de/resource/supplementary/13690_2013_59_MOESM3_ESM.pdf/9422492)

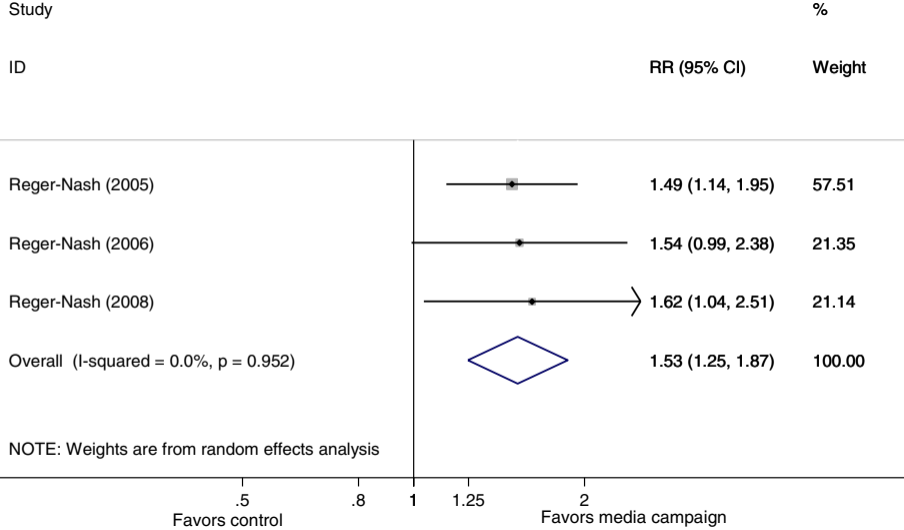

Supplement: MOESM3 [file 9422492]
